# 1 Bac-PULCE: Bacterial Strain and AMR Profiling Using Long Reads via 2 CRISPR Enrichment

## 3 Authors

4 Andrea Sajuthi, Julia White, Gayle Ferguson, Nikki E. Freed\*, Olin K. Silander\*

5 Address for all authors:

6 School of Natural and Computational Sciences, Massey University, Auckland, New Zealand

7 \*Corresponding authors: [n.freed@massey.ac.nz](mailto:n.freed@massey.ac.nz) (NEF) and [olinsilander@gmail.com](mailto:olinsilander@gmail.com) (OKS)

## 8 Abstract

9 Rapid identification of bacterial pathogens and their antimicrobial resistance (AMR) profiles is  
10 critical for minimising patient morbidity and mortality. While many sequencing methods allow  
11 deep genomic and metagenomic profiling of samples, widespread use (for example at  
12 point-of-care settings) is impeded because substantial sequencing and computational  
13 infrastructure is required for sequencing and analysis. Here we present Bac-PULCE (Bacterial  
14 strain and antimicrobial resistance Profiling Using Long reads via Crispr Enrichment), which  
15 combines CRISPR-cas9 based targeted sequence enrichment with long-read sequencing. We  
16 show that this method allows simultaneous bacterial strain-level identification and antimicrobial  
17 resistance profiling of single isolates or metagenomic samples with minimal sequencing  
18 throughput. In contrast to short read sequencing, long read sequencing used in Bac-PULCE  
19 enables strain-level resolution even when targeting and sequencing highly conserved genomic  
20 regions, such as 16S rRNA. We show that these long reads allow sequencing of additional AMR  
21 genes linked to the targeted region. In addition, long reads can be used to identify which  
22 species in a metagenomic sample harbour specific AMR loci. The possibility for massively  
23 multiplexing crRNAs suggests that this method has the potential to substantially increase the  
24 speed and specificity of pathogen strain identification and AMR profiling, while ensuring low  
25 computational overhead.

## 26 Introduction

27 With the rapid increase in antibiotic resistant bacteria, there is a need for methods to quickly  
28 identify antimicrobial resistance (AMR) profiles in clinical samples. Previously, most methods of  
29 AMR profiling in clinical practice have been culture based (Andrews, 2001; Jorgensen & Ferraro,  
30 2009; Kiehlbauch et al., 2000). These methods are often slow and require culturing for microbial  
31 identification and antimicrobial resistance (AMR) profiling.

32 Over the last decade, a range of newer techniques have been applied for strain and AMR  
33 profiling, including whole genome sequencing (Baker et al., 2018), metagenome sequencing  
34 (Chiu & Miller, 2019; Gu et al., 2019), mass spectrometry (Havlicek et al., 2013), microarrays  
35 (Wilson et al., 2002), microfluidics (Etayash et al., 2016), and others (Syal et al., 2017). A large  
36 number of methods rely on the amplification of specific sequences for diagnosis (Jain et al.,  
37 2016; Zumla et al., 2014). However, all of these methods require either substantial infrastructure  
38 (e.g. for sequencing and analysis); or are effective in identifying a limited range of bacterial  
39 strains or AMR profiles.

40 Recently, Quan et al. 2019 combined CRISPR-based sequence enrichment, PCR, and  
41 short-read sequencing to identify bacterial AMR genes in metagenomic samples using a  
42 method termed (Quan et al., 2019). FLASH allows extensive multiplexing for sensitive detection  
43 of a wide range of AMR loci while considerably decreasing compute overhead for analysis due  
44 to read enrichment. However, there are several limitations of this method. First, the reliance of  
45 FLASH on PCR amplification requires enriched loci to be targeted by pairs of crRNAs a specific  
46 distance apart. Second, the use of short reads makes it difficult to discover linked AMR loci, or  
47 AMR context (e.g. plasmid vs. chromosomal). Finally, there are substantial sequencing  
48 resources required (although compute resources are considerably reduced).

49 To circumvent these issues, here we present Bacterial strain and antimicrobial resistance  
50 Profiling Using Long reads via Crispr Enrichment (Bac-PULCE), which combines  
51 CRISPR-based enrichment of conserved bacterial and AMR loci followed by long-read  
52 sequencing (**Fig S1**). This method results in rich information on loci linked to the target  
53 sequence of interest, allowing bacterial strain-level resolution even when enriching conserved

54 target sequences (such as 16S). In addition, long reads allow linked AMR genes to be  
55 discovered even when they are not targeted.

56 A critical advantage of Bac-PULCE over long-read metagenomic methods is that enrichment  
57 and sequencing of specific sequences from mixed metagenomic samples decreases the  
58 computational overhead required for inferring bacterial taxa and AMR profiling. One limiting  
59 factor in the use of the Oxford Nanopore sequencing platform is that it requires substantial  
60 compute power for basecalling (e.g. GPU) and for downstream bioinformatic tasks (e.g. large  
61 numbers of CPUs for read classification). Here we show that it is possible to decrease the  
62 amount of sequencing data and computational load of downstream analyses more than  
63 100-fold, while achieving comparable resolution of AMR loci. The efficiency of this method could  
64 feasibly allow basecalling and sequence analyses to be performed locally with minimal compute  
65 power.

## 66 Results

### 67 Enrichment and sequencing of a variable locus in cultured bacteria

68 To test the feasibility of using CRISPR-Cas9 sequence enrichment and long read sequencing  
69 (Profiling Using Long reads via Crispr Enrichment; Bac-PULCE) for bacterial strain typing, we  
70 first designed two crRNAs (see **Methods**) targeting two sequences surrounding the *E. coli gnd*  
71 locus. The *gnd* locus is known to be highly polymorphic in *E. coli*, and has been used previously  
72 to type strains (Cookson et al., 2017). We designed one crRNA to target a sequence upstream  
73 of *gnd* (within *hisF*) and the other to target downstream of *gnd* (within *wcaM*), with approximately  
74 20 kilobase pairs (Kbp) between these two target sites (**Table 3**). To simultaneously test whether  
75 we could enrich the *gnd* locus from a complex sample, we mixed equal masses of genomic DNA  
76 from *E. coli* K12 MG1655 with human genomic DNA and used the Bac-PULCE method to  
77 sequence the enriched DNA on a MinION flow cell (see **Methods**).

78 As a result we generated 43,024 reads, totalling 370.3 Megabase pairs (Mbp) of sequence data  
79 with a mean read length of 8,606 bp. 95.3% of these reads mapped to the *E. coli* MG1655  
80 genome (mean read length 8,840 bp), and the majority of these reads (52.8%) mapped to the  
81 *gnd* region. Only 4.40% of all reads mapped to the human genome (mean read length 4,064 bp)  
82 indicating clear enrichment of DNA from *E. coli* MG1655. The median coverage depth across

83 the *E. coli* MG1655 chromosome was 33, while the maximum depth at the cut site in *wcaM* was  
84 11,799 (**Fig 1A**). This is an increase of more than 350-fold depth at the target site over  
85 background. Importantly, we found that the cutting efficiency of each crRNA differed  
86 substantially. The *hisF* crRNA was far less efficient at binding and cutting than the crRNA in  
87 *wcaM*. This is clearly evidenced by examining the number of reads that start at each cut site,  
88 with greater than four-fold the number of reads originating at the *wcaM* cut site compared to  
89 *hisF* (**Fig 1B**).

90 We also found differences in directionality bias. We expect that the majority of reads starting at a  
91 cut site will be in a single direction, despite the fact that the Cas9 cut creates two 3'  
92 phosphorylated ends. This is because the CRISPR-Cas9 complex likely remains bound to the  
93 strand containing the target site, and prevents motor ligation and sequencing. However, we  
94 found that at the *hisF* cut site, almost equal numbers of reads occurred in both directions (**Fig**  
95 **1B**). In contrast, at the *wcaM* locus, a majority of reads started in only one direction. Overall,  
96 these results indicated that targeting a locus with a single crRNA should allow efficient  
97 enrichment through crRNA binding and cutting, followed by long-read sequencing, although  
98 crRNA binding and cutting efficiency can differ considerably. We next tested whether reads at  
99 the *gnd* locus could be used for strain-level identification.

100 We first generated genomic sequence data and assembled the genome of a novel  
101 environmental isolate of *E. coli* strain, L3Cip3 (Van Hamelsveld et al., 2019), into a single  
102 circularised 4.93 Mbp chromosomal contig, four circularised contigs likely to be plasmids (177  
103 Kbp, 88.9 Kbp, 84.0 Kbp, and 44.7 Kbp), and two short circularised contigs likely to be  
104 fragments (2255 bp and 1565 bp) (see **Methods**). We then mapped the reads generated from  
105 Bac-PULCE from the *E. coli* MG1655 *gnd* locus to this second strain of *E. coli*. We found that  
106 although these reads mapped, it was readily apparent that they did not map over their full  
107 length, as indicated by sudden drops in the coverage depth (**Fig. 1C**). In this case, the drop in  
108 coverage depth was due to the loss (via homologous recombination) of an operon present in *E.*  
109 *coli* MG1655 that contained several genes active in capsule polysaccharide biosynthesis. These  
110 results suggested that by using long reads, accurate strain-level classification would be possible  
111 using highly variable regions such as the *E. coli* *gnd* locus, which is prone to homologous  
112 recombination. It also suggested that targeting a more conserved gene, such as 16S ribosomal  
113 RNA genes would be feasible.

114

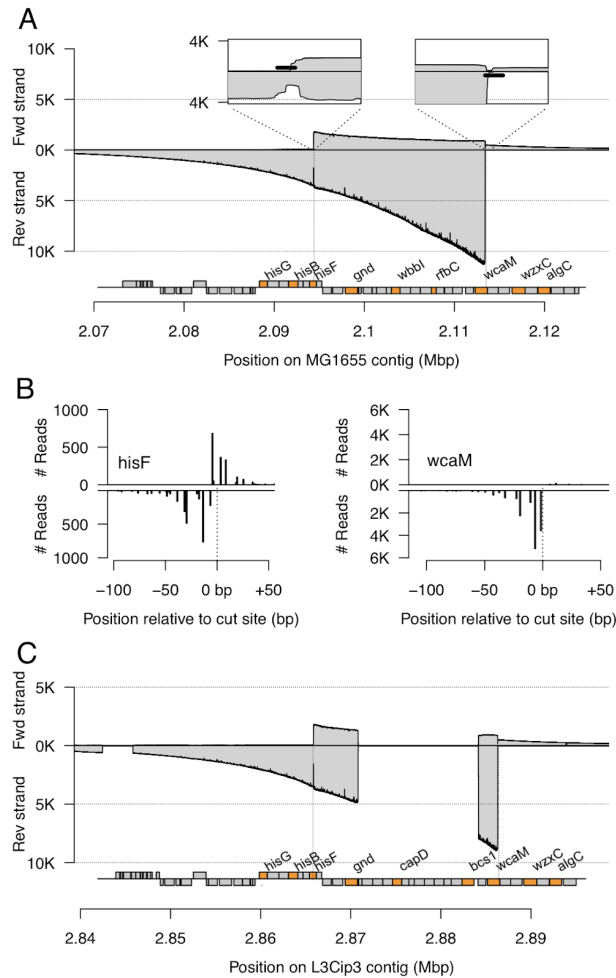

**Figure 1. Long reads from Bac-PULCE allow strain-level identification. A. Bac-PULCE allows for more than 100-fold enrichment of sequencing of target loci.** We used two crRNAs that flank the highly polymorphic *gnd* locus in *E. coli*, one in *hisF* and the other in *wcaM*, and sequenced the target-enriched DNA using long read nanopore sequencing. We mapped all reads to the *E. coli* MG1655 genome. The coverage depth of reads that map to the top strand is shown above the x-axis, while the coverage depth of reads mapping to the bottom strand is shown below the x-axis. All annotated genes around the *gnd* locus are shown beneath, with several genes labelled for context (labelled genes are coloured in orange). The insets show the cut regions at higher resolution, with the binding sites of the crRNAs indicated by thick lines. **B. crRNAs exhibit clear differences in efficiency and directionality bias.** The two plots indicate the number of reads starting near each crRNA cut site. Lines above the axis indicate reads starting on the top strand; lines below begin on the bottom strand. The left plot indicates the cut site of the *hisF* crRNA. The right plot indicates the cut site of the *wcaM* crRNA. The crRNA targeting *wcaM* is highly efficient and exhibits considerable directionality bias, with almost 10,000 reads originating within 10 bp of the cut site, and these occurring almost solely on the bottom strand. In contrast, the crRNA targeting *hisF* is less efficient, with fewer than 2,000 reads originating within 10 bp of the cut site, and reads starting on both strands. **C. Reads from the *gnd* region of *E. coli* MG1655 mapped to the environmental *E. coli* L3Cip3 exhibit substantial gaps due to loss of homology.** The *wbb* operon region has been replaced in L3Cip3 through a homologous recombination event, resulting in a loss of homology. This suggests that strain-level classification may be possible using long reads from the highly variable *gnd* region.

## 134 Enrichment and sequencing of a conserved locus

135 The *gnd* locus is specific to *E. coli*, and targeting this region in other bacterial taxa, or in a  
136 complex metagenomic sample would enrich only for *E. coli* sequences, and thus can not be  
137 used to enrich identify sequences from strains of distantly related groups of bacteria. Therefore,  
138 we next tested whether accurate strain-level identification would be possible using crRNAs  
139 targeting conserved genomic loci. We designed a crRNA targeting the highly conserved 16S  
140 ribosomal RNA genes and using Bac-PULCE, enriched and sequenced 16S loci from clonal  
141 L3Cip3 genomic DNA.

142 We generated 78,791 reads, with 92.5% of these reads mapping to the *E. coli* L3Cip3 genome.  
143 We also mapped these reads to the *E. coli* K12 MG1655 genome. We found that even when  
144 mapping reads that originated from highly conserved 16S loci (of which there are seven total in  
145 *E. coli*), in the genomic regions surrounding the 16S loci, small indels and duplications were  
146 present that clearly indicated whether reads had mapped as expected (**Fig 2A and B; Fig S2**).  
147 These could only be observed by relying on long reads that extended beyond the conserved  
148 16S locus into these more polymorphic regions.

149 To test the limits of taxa identification in a more systematic manner, we mapped the reads  
150 originating from the 16S loci in L3Cip3 to the rrnDB 16S database (Stoddard et al., 2015), which  
151 consists of full length 16S rRNA from 77,530 bacterial species (see **Methods**). We found that  
152 97.6% of these reads had their primary mapping to ribosomal sequences from either  
153 *Escherichia* or *Shigella* (which is a polyphyletic genus within the *E. coli* species complex). The  
154 vast majority of incorrect matches were short alignments: 99.8% of all mappings with alignments  
155 longer than 1400bp were to ribosomal sequences from either *Escherichia* or *Shigella*. These  
156 results suggest that using Bac-PULCE to selectively sequence 16S regions allows precise  
157 identification of taxa to at least the level of genus.

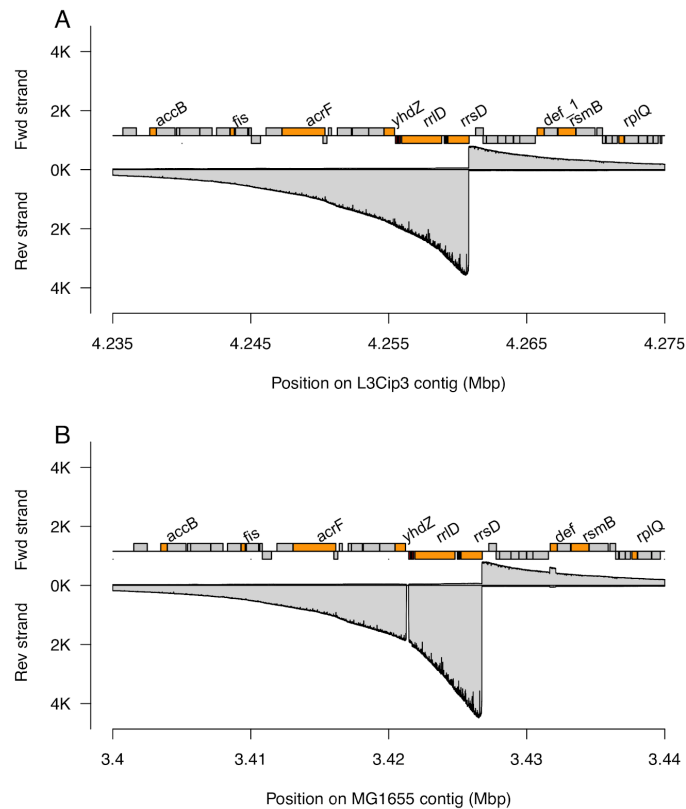

158

159 **Figure 2. Small insertions and deletions at highly conserved 16S loci allow reads from different**  
160 **strains to be distinguished. A. Coverage depth for one of the seven 16S loci in the L3Cip3**  
161 **genome.** The depth of reads that map to the top strand are shown above the x-axis, while reads mapping  
162 to the bottom strand are shown below the x-axis. Several ORFs are annotated (coloured in light blue). **B.**  
163 **Coverage depth for the homologous region in the MG1655 genome.** Relative to L3Cip3, there have  
164 been small deletions (here in a region just upstream of two tRNAs) and duplications in the MG1655  
165 genome, indicated by drops or increases in coverage. These have occurred adjacent to the highly  
166 conserved 16S region, but are only apparent with long reads extending beyond the highly conserved 16S  
167 locus. This locus is one of seven 16S loci; all others exhibit similar discrepancies in coverage depth (**Fig**  
168 **S2**).

168 Strain level identification

169 We next tested the accuracy of using reads from both the *gnd* and 16S loci for strain-level  
170 identification. We mapped the *gnd* and 16S reads from *E. coli* L3Cip3 against a database  
171 consisting of the L3Cip3 genome and whole genome sequences from 58 additional *E. coli*  
172 strains encompassing the diversity of the *E. coli* clade (see **Methods**; **Fig. S3**). For both *gnd*  
173 and 16S, we found that the mapping was highly specific, with approximately 90% of all 16S  
174 reads having their primary mapping to the strain of origin. In the case of *gnd*, this fraction  
175 exceeded 99% (**Fig. 3**). Furthermore, there was a clear relationship between both mapping

176 quality and read length on the accuracy of strain-level assignment: long reads and reads with  
177 high mapping quality were very likely to correctly identify the strain, with accuracy considerably  
178 exceeding 99% for reads exceeding 15 Kbp in length even for the 16S locus. This clearly  
179 indicates that even when using Bac-PULCE to target highly conserved loci such as 16S rRNA  
180 genes, it is possible to precisely identify the bacteria at the strain-level. This vastly improves  
181 taxonomic resolution beyond what is currently possible when sequencing just the 16S region, and is  
182 made possible by the length of the reads (Johnson et al., 2019).

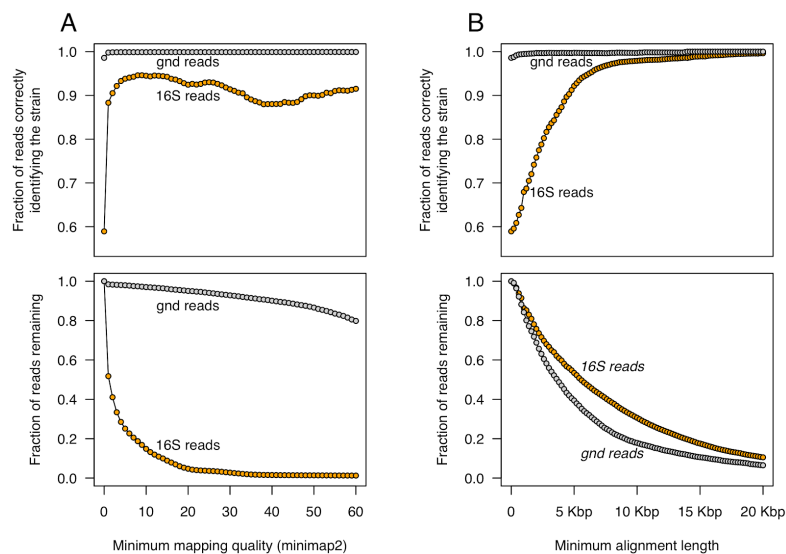

183

184 **Figure 3. Long reads allow unambiguous identification of *E. coli* taxa at the strain level. A.**  
185 **Relationship between mapping quality and the accuracy of strain assignment for the *gnd* and 16S**  
186 **loci.** The top panel shows the fraction of reads mapped to the correct strain (L3Cip3) as a function of  
187 mapping quality, while the bottom panel shows the fraction of reads with that mapping quality or higher. At  
188 a minimum mapping quality of 1 almost 90% of all 16S reads map to the correct strain despite this locus  
189 being highly conserved. The fraction of correctly mapped reads is far higher for the polymorphic *gnd*  
190 locus. **B. Relationship between read length and the accuracy of strain assignment.** The top panel  
191 shows the fraction of reads mapped to the correct strain (L3Cip3) as a function of read length, while the  
192 bottom panel shows the fraction of reads of that read length or longer. In contrast to the relationship  
193 between read quality and classification accuracy for 16S, at long read lengths (e.g. more than 15 Kbp),  
the accuracy of strain assignment exceeds 99%.



## 194 Sequence context affects Bac-PULCE efficiency

195 The data here show that accurate strain-level classification is possible even when targeting  
196 highly conserved loci. In addition, we found that binding and cutting efficiency can differ  
197 substantially between loci. We hypothesised that these differences could arise either from the  
198 specific target sequence, or from the genomic context of the target site. We thus next examined  
199 variability in the cutting efficiency of different loci for an individual crRNA (Liu et al., 2016).

200 We designed a crRNA targeting identical sequences in multiple copies of beta-lactamase genes  
201 which were present on two plasmids in L3Cip3. All three of these copies are identical in  
202 sequence. Here again we found that the crRNA cut with high efficiency and specificity, but that  
203 this varied among cut sites both in terms of strand bias and efficiency (**Fig. 4A** and **4B**), despite  
204 the target sequences being identical. Of the three beta-lactamase loci targeted by the crRNA,  
205 one cut such that Oxford Nanopore motors ligated to both strands at almost equal levels (**Fig**  
206 **4C**), while a second cut such that reads were phosphorylated almost exclusively at only one  
207 end. Again, we hypothesise that directionality bias is due the CRISPR-cas9 complex remaining  
208 bound to the DNA and subsequently blocking ligation of the motor complex. However, in contrast  
209 to the results above, when we repeated this analysis for the crRNA targeting the 16S regions,  
210 we found that all seven 16S regions were cut and sequenced almost identically (**Fig. S4**).

## 211 Bac-PULCE allows identification of additional linked AMR loci

212 In addition to long reads providing information on polymorphic regions near to conserved 16S  
213 loci, long reads allowed ready identification of additional AMR loci linked to the targeted  
214 bla-TEM loci. One plasmid had only a single copy of the bla-TEM locus, and was thus cut once  
215 (**Fig 4B**). However, the majority of the reads extended well beyond this locus, such that an  
216 additional three AMR loci were sequenced, including a gene for aminoglycoside resistance,  
217 dihydrofolate resistance, and tetracycline resistance. The maximum coverage depth on the  
218 bottom strand of the targeted bla-TEM locus on this plasmid at position 81.1Kbp was 2,488.  
219 Median read depth was 2,028 at the aminoglycoside resistance locus 1.9 Kbp upstream of the  
220 targeted locus; 1,028 at the dihydrofolate resistance locus 9.1 Kbp upstream; and 564 at the  
221 tetracycline resistance locus 16.8 Kbp upstream. This contrasts with a median depth of 67 over  
222 the whole plasmid. This is also apparent at the level of individual reads. 3,049 reads begin or  
223 end within the targeted bla-TEM gene (the majority on the bottom strand). 2,113 (69.3%) of

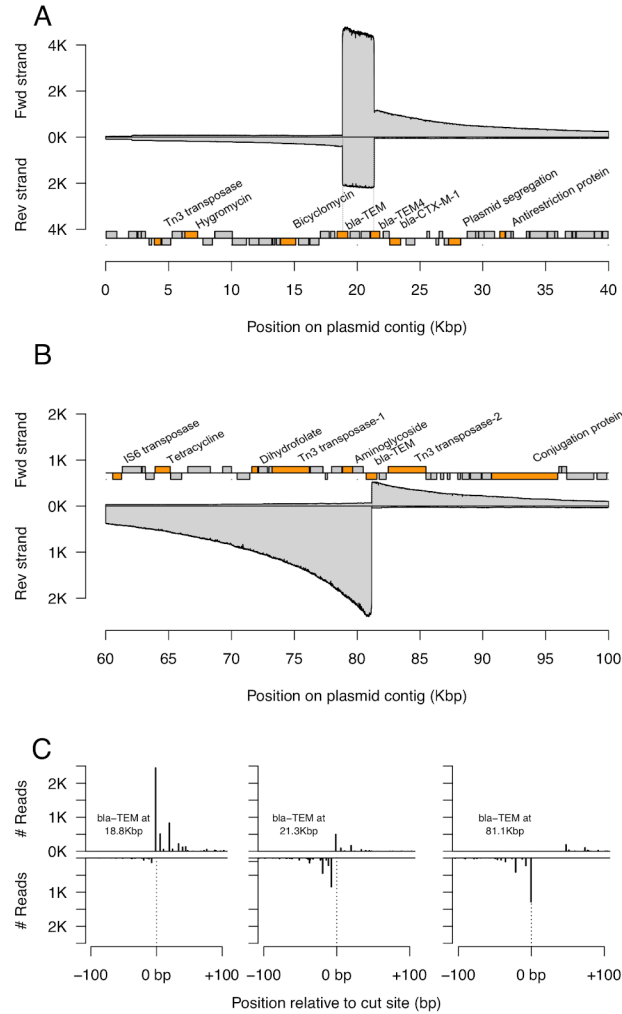

224

**Figure 4. Variability in crRNA cutting for identical target sequences.** We used a single crRNA to target multiple versions of a beta-lactamase resistance gene present on two different plasmids in L3Cip3. These target loci have identical sequences, although the surrounding sequence context is different. **A. Coverage depth at a region with two beta-lactamase genes and target cut sites.** The depth of reads that map to the top strand are shown above the x-axis, while reads mapping to the bottom strand are shown below the x-axis, with several ORFs annotated (coloured in orange), including the beta-lactamase resistance genes (bla-TEM). **B. Coverage depth at a region with a single beta-lactamase gene and target cut site.** **C. Each cut site exhibits a unique binding and cutting efficiency as well as directionality bias.** The three plots indicate the number of reads starting near each crRNA cut site. Lines above the axis indicate reads starting on the top strand; lines below begin on the bottom strand. The plots are shown in the order of cut sites, with the locations of the cut sites indicated on each plot. Cuts at the first bla-TEM locus are efficient and have a clear directionality bias; cuts at the second bla-TEM locus are less efficient and have less bias, with reads almost equally likely to start on the top or bottom strand. Reads at the third bla-TEM locus again show clear bias. This locus is on a separate plasmid that is present at approximately 0.41 lower copies than the first (as inferred through read coverage), suggesting that cutting efficiency differs little between the first and third cut sites.

240 these include the part or all of the aminoglycoside locus; 981 (32.2%) contain part or all of the  
241 dihydrofolate locus; and 530 (17.4%) contain part or all of the dihydrofolate locus.

## 242 Sensitivity and multiplexing capability

243 Finally, we tested the sensitivity and multiplexing capability of this method. We first sequenced a  
244 metagenomic sample consisting of faecal samples from four sheep and one cow on a single  
245 MinION flow cell (see **Methods**), yielding a total of 8.83 million reads and 24.5 Gbp, an amount  
246 of data that required more than 24 hours to basecall on standard GPU, and far longer using  
247 CPU resources alone. We mapped these reads against the resfinder database (Bortolaia et al.,  
248 2020) to identify AMR loci. We found a total of 188 reads matching AMR loci (0.002% of all  
249 reads). This varied substantially between samples, from 0.0052% in the single cow sample (124  
250 out of 2.36 million reads) to 0.00071% (5 out of 702 thousand reads) in one sheep sample.

251 We next designed crRNAs targeting ten different AMR loci found in this metagenomic sample  
252 (see **Methods**). Pooling several faecal samples together, we used these ten crRNA and an  
253 additional crRNA targeting 16S, and performed Bac-PULCE using a single MinION flow cell.  
254 This resulted in a total of 37,200 reads. Of these, 53 reads (0.14%) mapped to four different  
255 AMR types (**Table 1**). Some of these were sequenced in numbers close to that of the original  
256 metagenomic run (e.g. *cfxA*), despite sequencing approximately 250-fold less data in the  
257 Bac-PULCE run. This clearly illustrates the power of this approach, in that far less data is  
258 required to achieve a similar level of accuracy in AMR profiling. However, other AMR loci were  
259 sequenced far less efficiently or not at all (e.g. the ResFinder loci *aac(6'')-aph(2'')\_1\_M13771* or  
260 *aph(2'')-la\_2\_AP009486*, which provide aminoglycoside resistance).

261 We next aimed to identify the organismal context of these AMR loci, relying on the length of the  
262 reads to provide this context. Focusing only on the individual reads that mapped to *cfxA* genes  
263 in ResFinder, we used BLAST to find matching taxa in the nt database (**see Methods**), only  
264 considering reads with more than 100bp of sequence that was not part of the *cfxA* gene (36 out  
265 of 39 reads). We found that the majority of *cfxA* genes were contained in a chromosomal  
266 context in *Prevotella* spp. (58%; **Table 2**), despite *Prevotella* spp. being present at less than 1%

267 frequency in all samples. Thus, leveraging read length yields considerable insight into the  
268 organismal and genomic context of these AMR loci.

269 **Table 1. Number of reads found for different AMR loci.** The locus (as annotated in ResFinder) is  
270 indicated in the first column, with two exceptions, *cfxA* and *tet(W)*, for which the specific AMR types  
271 cannot be differentiated because the crRNA targets a conserved region in the locus. The number of reads  
272 mapping to each locus are indicated in the second and third columns for the full metagenomic run and  
273 Bac-PULCE run, respectively.

| AMR locus                        | Metagenomic | Bac-PULCE |
|----------------------------------|-------------|-----------|
| <i>cfxA</i>                      | 80          | 39        |
| <i>lnu(C)_1_AY928180</i>         | 11          | 11        |
| <i>catB_1_M93113</i>             | 7           | 1         |
| <i>tet(W)</i>                    | 3           | 2         |
| <i>aac(6')-aph(2'')_1_M13771</i> | 10          | 0         |
| <i>aph(2'')-la_2_AP009486</i>    | 9           | 0         |
| <i>nimJ_1_NZ_JH815495</i>        | 2           | 0         |
| <i>tet(O)_1_M18896</i>           | 2           | 0         |

274 **Table 2. Organismal context of *cfxA* resistance loci.** We trimmed all Bac-PULCE reads mapping to  
275 *cfxA* genes to remove the portion matching the *cfxA* gene, and BLASTed the read against the NCBI nt  
276 database. The genus of the top hit is listed in the first column, followed by the number of reads mapping  
277 to that genus, followed by the median percent identity for all reads matching that genus. Oxford Nanopore  
278 reads have a mean accuracy of approximately 93%, so we would expect a strain-level match to be  
279 approximately 93% identical and a species-level match to be slightly lower. Most matches have 90% or  
280 less identity; thus we identify taxa only at the level of genus.

| Genus                   | Number of reads | median %ID |
|-------------------------|-----------------|------------|
| <i>Prevotella</i>       | 21              | 90.0       |
| <i>Porphyromonas</i>    | 3               | 81.0       |
| <i>Tannerella</i>       | 3               | 89.0       |
| <i>Bacteroides</i>      | 2               | 80.9       |
| <i>Capnocytophaga</i>   | 2               | 91.3       |
| <i>Lachnospiraceae</i>  | 2               | 96.4       |
| <i>Chryseobacterium</i> | 1               | 96.4       |

281 Finally, we quantified the efficiency of 16S enrichment from the metagenomic sample. We first  
282 mapped all reads from the full metagenomic run to the rrnDB 16S database. For the full  
283 metagenomic run, 61,779 reads (0.70%) mapped to this database. As alignment length is  
284 closely related to the accuracy of taxon matches, we filtered this set to consider only read  
285 alignments longer than 1200bp (near full length 16S matches (Cuscó et al., 2017). This resulted  
286 in 17,257 reads (0.20%). In the same Bac-PULCE run as above, we obtained 1,127 reads  
287 (3.0%) matching the 16S rrnDB, with 692 (1.9%) of these reads being longer than 1200 bp. This  
288 is only 4% of the total full length alignments we obtained in the metagenomic run, and suggests  
289 that although 16S regions were enriched in this dataset, the efficiency was far below the  
290 enrichment for AMR loci.

## 291 Discussion

292 Here we have shown that by targeting and enriching specific loci using CRISPR-cas9 to cut at a  
293 single locus, followed by long-read sequencing (Bac-PULCE), we can profile bacterial taxa at  
294 strain-level accuracy. We have shown this is possible using highly conserved 16S rRNA loci,  
295 allowing for far greater taxonomic resolution than is currently available from even sequencing  
296 the full length 16S gene. We have also shown this method is able to target and enrich, by over  
297 100 fold, sequences from AMR loci in a complex metagenomic sample. Additionally the long  
298 reads generated from Bac-PULCE allow sequencing of unknown loci (e.g. additional AMR  
299 genes) linked to targeted regions.

300 We found wide variation in the efficiency with which different targets were bound and cut by the  
301 crRNA. This was most clear when using Bac-PULCE for enrichment of AMR loci from the  
302 metagenomic sample: we failed to sequence some AMR loci at all, although up to ten reads  
303 were sequenced during the full metagenomic run. In addition to this probable crRNA  
304 sequence-dependence, we found that the efficiency of target enrichment depends on the larger  
305 sequence context of the crRNA binding site: identical sequences in different genomic locations  
306 can differ by more than two-fold in efficiency. The variability we observed emphasises the  
307 necessity of optimising crRNA pools for efficient binding, cas9 cutting, and sequencing. This is  
308 best illustrated by the inefficient enrichment of 16S loci from metagenomic samples that we  
309 observed: despite observing more than 300-fold enrichment of 16S loci in single isolates, we  
310 observed only 10-fold enrichment from the metagenomic sample. Further work using large scale

311 multiplexing in complex samples should allow the optimization of crRNA target sites to improve  
312 the efficiency of the Bac-PULCE approach.

313 There are three primary advantages of Bac-PULCE over other CRISPR-cas9 enrichment  
314 strategies and short-read sequencing methods such as FLASH (Quan et al., 2019). First, by  
315 targeting AMR loci with single crRNAs, long reads enable sequencing of linked AMR loci,  
316 increasing the resolution of profiling even when all AMR genes are not targeted for enrichment  
317 and sequencing. This is also advantageous for profiling bacterial strains: highly conserved loci,  
318 such as 16S, can be targeted such that a broad range of bacteria can be profiled. By matching  
319 these sequences against 16S databases (such as rrnDB), major genera can be profiled.  
320 Strain-level resolution can then be obtained by taking the subset of reads that match each  
321 genus (or species), and mapping these against genomes from a wide range of strains within this  
322 genus (as we have done here). This is a powerful approach, and could allow strain-level  
323 resolution of pathogens from complex samples even when the genus or family of the pathogen  
324 is unknown.

325 Second, because sequencing reads can be of any length and no PCR step is used, only a  
326 single cut site is required, considerably increasing flexibility. Third, very little sequencing  
327 throughput is required for successful strain typing and AMR profiling. This is critical because  
328 although Oxford Nanopore sequencing requires very little laboratory infrastructure, there are still  
329 considerable demands for compute power. For example, basecalling a single run usually  
330 requires more than 24 hours on a standard GPU. Downstream bioinformatic analyses require  
331 additional compute power. Thus, we expect that the limited sequencing throughput required for  
332 successful strain typing and AMR profiling should allow rapid screening of complex samples  
333 using low-cost infrastructure and less than 1/100th of the compute resources for both DNA  
334 sequencing and downstream analyses.

335 There are, however, two drawbacks to the Bac-PULCE approach at this point. The first is that it  
336 requires substantial biomass. Here we have used samples from pure culture or from fecal  
337 samples, yielding  $\mu\text{g}$  quantities of DNA. This requirement contrasts with approaches that rely  
338 upon enrichment followed by amplification, such as FLASH (Quan et al., 2019). However, we  
339 expect that by combining Bac-PULCE with methods of non-specific DNA amplification, such as  
340 those used for whole genome amplification, we may be able to considerably decrease the  
341 amount of biomass required. Second, sequencing efficiency is low. This is a function of both the

342 rarity of the target sequences in the sample, and the efficiency of crRNA binding, cas9 cutting,  
343 and attachment of the motor protein. Again, we expect that we can exploit the flexibility of  
344 requiring only a single cut site, and the possibility of using highly multiplexed pools of crRNAs to  
345 select the most efficient crRNAs for each target sequence of interest (e.g. 16S rRNA). This  
346 should further increase the sequencing efficiency and throughput of this approach.

## 347 Methods

### 348 DNA isolation

349 We isolated bacterial genomic DNA from 2mL of an overnight culture of L3Cip3. We isolated  
350 human DNA from pooled buccal cell samples from anonymised donors. For both DNA isolations,  
351 we used the Promega Wizard Genomic DNA Purification Kit per manufacturer instructions with  
352 the following modifications. Following the protein precipitation step, we performed an additional  
353 centrifugation step. Additionally, we washed the DNA pellet twice in 70% ethanol. We rehydrated  
354 the DNA in 32uL water overnight for 18 hours.

355 DNA from cow and sheep faecal samples was extracted using the Qiagen PowerSoilPro kit  
356 according to manufacturer instructions.

### 357 Genome sequencing

358 For Nanopore bacterial genome sequencing of L3Cip3 (Van Hamelsveld et al., 2019), we  
359 followed the manufacturer's protocol for the SQK-RBK004 kit (Version:  
360 RBK\_9054\_v2\_revM\_14Aug2019). We sequenced the sample on a R9.4 flow cell (MinION  
361 software MinKnow 3.6.0) and basecalled using guppy v3.4.4. Illumina sequencing was  
362 performed by the Microbial Genome Sequencing (MiGS) Center using 150bp PE reads.

### 363 Genome assembly

364 We used Unicycler v0.4.5 (Wick et al., 2017) for hybrid genome assembly of L3Cip3, with a total  
365 of 221 Mbp of Oxford Nanopore data (mean length 2.3 Kbp) and 150bp PE Illumina data (1.99M  
366 reads, 525.6 Mbp). We annotated the assembly using prokka v1.14.6 (Seemann, 2014).

### 367 crRNA design

368 To enrich for the *gnd* locus we targeted conserved sequences in the *hisF* and *wcaM* open  
369 reading frames. To enrich for 16S loci we targeted a sequence in *rrsH*, which is present in all  
370 seven *E. coli* ribosomal operons. To enrich for beta-lactamase AMR we designed a crRNA that



371 matched all three bla-TEM loci in L3Cip3. To design crRNAs targeting all other AMRs, we used  
372 the sequences of the AMR locus found in the ResFinder 4.0 database (Bortolaia et al., 2020).

373 To design crRNA targeting *gnd*, beta-lactamase, and 16S, we used CHOPCHOP with the  
374 CRISPR/Cas9 setting (Labun et al., 2016, 2019), using the human GRCh38 as background. For  
375 all other crRNAs, we used the same settings except with *Bos taurus* as background. We set  
376 sgRNA length without PAM as 20, PAM-3' as NGG, allowed up to 3 mismatches in the  
377 protospacer, and used the efficiency score from Doench et. al. 2014 (Doench et al., 2014). We  
378 filtered all results to retain sequences with GC content between 40-80%, self-complementarity  
379 scores of 0, Mismatch (MM) 1 scores of 0, MM2 scores of 0, and MM3 scores <5.

380 **Table 3. crRNA sequences.** The locus (as named in ResFinder for the AMR loci, or the named  
381 locus for *E. coli* MG1655) is listed in the first column, and the 5' to 3' sequence of the crRNA is  
382 listed in the second column. All target regions matching the crRNA have a NGG PAM sequence  
383 at the 3' end

| Target locus              | crRNA sequence       |
|---------------------------|----------------------|
| aac(6')-aph(2'')_1_M13771 | AUUGGUGCAAUCCCUCAAUA |
| aph(2'')-la_2_AP009486    | CCAGAACAUGAAUUACACGA |
| blaOXA-235_1_JQ820240     | ACGUGCCAGUCCUGAUAGA  |
| catQ_1_M55620             | AAUCCGGUAAAAUUCACCCA |
| cfxA4_1_AY769933          | ACCGCCACACCAAUUUCGCC |
| lnu(C)_1_AY928180         | CAUCAAACUCGUAUCCCAGA |
| mef(A)_1_AJ971089         | CUUUCGGUGCCAUUUUAUAG |
| nimJ_1_NZ_JH815495        | UAUGACCGCUCAGUGCACUA |
| tet(O)_1_M18896           | AAGCCUGCUCCAAUACGAUA |
| tet(W)_1_DQ060146         | ACGCUGCCGCUCCAAAAACA |
| <i>rrsH</i>               | UGGCUCAGAUUGAACGCUGG |
| <i>wcaM</i>               | AAUUACGCCAUCUUACGCCA |
| <i>hisF</i>               | GUACAGGAAGUGCAAAAACG |
| beta-lactamase (L3Cip3)   | UUACUUCUGACAACGAUCGG |

## 384 crRNA and tracrRNA synthesis

385 We *in vitro* transcribed crRNA and tracrRNA from DNA oligos using a modified *in vitro*  
386 transcription protocol (Quan et al., 2019). Briefly, to all crRNA sequences (**Table 3**) we added  
387 the T7 RNA polymerase binding site (5'-TAATACGACTCACTATAG-3') at the 5' end. To the 3' end  
388 of the crRNA sequences, we added the tracrRNA binding sequence  
389 (5'-**GTTTTAGAGCTAT**GTCTGTTTTG-3') to allow base-pairing of the crRNA to the tracrRNA.

390 To transcribe the tracrRNA, we used a DNA oligo with the full length tracrRNA sequence  
391 together with T7 RNA polymerase binding site at the 5' end (underlined). Nucleotides in bold are  
392 positions that form base-pairing between the tracrRNA binding sequence and the full length  
393 tracrRNA.

394 5' TAATACGACTCACTATAGGACAGCAT**AGCAAGTTAA**AATAAGGCTAGTCCGTTATCAACTTGA  
395 AAAAGTGGCACCGAGTCGGTGCTTTTT 3'

396 To transcribe the crRNA and tracrRNA from DNA oligos, we used the *in vitro* transcription  
397 protocol from Lyden et al. 2019 (Lyden, 2019). up to the step of RNA synthesis. For RNA  
398 synthesis we used the NEB Standard RNA Synthesis protocol (E2050, New England Biolabs).  
399 We then added 1.5x volumes of ethanol to the reaction, followed by purification using a 1x  
400 volume of Ampure XP beads. We eluted the RNA off the beads in 32µL water.

## 401 CRISPR enrichment and sequencing

402 For target sequence enrichment we used the Oxford Nanopore Cas-mediated PCR-free  
403 enrichment protocol v. ENR\_9084\_v109\_revF\_04Dec2018 per manufacturer instructions.  
404 Briefly, we prepared ribonuclear proteins (RNPs) using pooled crRNAs, tracrRNA, and  
405 Integrated DNA Technologies Alt-R S.p. HiFi Cas9 Nuclease V3. We then combined  
406 dephosphorylated DNA samples with the RNPs. We dA tailed the CRISPR-Cas9 cleaved target  
407 sequences and ligated adapters to these ends.

## 408 Basecalling and demultiplexing

409 For basecalling and demultiplexing we used three versions of the Oxford Nanopore guppy  
410 basecaller: v.3.2.6 (for the experiment using crRNA targeting *wcaM* and *hisF*); v.3.4.4 (for the

411 experiments targeting *wcaM*, 16S, and beta-lactamase; and for the full metagenomic  
412 sequencing); or v.4.0.14 (for the experiment using Bac-PULCE on metagenomic DNA sample).  
413 These versions differ by approximately 1% in mean accuracy, and we do not expect that this  
414 affects our results here.

## 415 Read mapping and analysis

416 For all read mapping we used minimap2 with the flags *map-ont* and *--secondary=no*. To test the  
417 specificity of mapping for reads originating from the MG1655 *gnd* locus, we considered only  
418 reads mapping to a 100 Kbp region surrounding the *gnd* locus in MG1655. To test the specificity  
419 of mapping for reads originating from 16S loci, we first extracted reads containing any partial  
420 16S sequence by mapping all reads against all rrnDB sequences from *Escherichia* or *Shigella*.  
421 To test for genus-level specificity we then mapped this subset of 16S reads from the sample to  
422 the full rrnDB database. To test for strain-level specificity, we mapped the read subsets to a  
423 database consisting of 58 whole genomes of *E. coli* (Breckell & Silander, 2020).

424 To calculate the number of reads originating at the bla-TEM locus that also contained the  
425 upstream aminoglycoside, dihydrofolate, or tetracycline AMR loci, we extracted all reads  
426 originating within the bla-TEM locus, and mapped these to the open reading frames of the  
427 respective AMR gene using minimap2. We inferred that reads successfully mapping to these  
428 ORFs contained enough information to determine whether that AMR gene was also present on  
429 the read, and thus co-occurring with the targeted AMR locus (in this case, bla-TEM).

430 To infer bacterial taxa present in the cow and sheep metagenomic samples using 16S reads, we  
431 mapped all reads to the 16S rrnDB database. We then filtered all matches to consider only  
432 near-full length matches (more than 1200 bp).

433 To infer the organismal context of the *cfxA* loci in this complex metagenomic sample, we first  
434 identified the reads mapping to any *cfxA* genes in ResFinder. We then trimmed the portion of  
435 the read matching the gene, plus approximately 30 additional bp, and only retained reads with  
436 more than 100bp of trimmed sequence. We then BLASTed the remaining portion of each read  
437 against a local nt database (downloaded on November 1, 2019).

438 We performed all statistical analyses using R v 4.0.2 (Stoddard et al., 2015). We performed all  
439 visualisations of genomic loci using genoplotsR (Guy et al., 2010).

## 440 Acknowledgments

441 We thank the Heinemann group at the University of Canterbury for providing the L3Cip3 isolate  
442 and Dr. Megan Devane of the Environmental Science and Research Crown Research Institute  
443 of New Zealand for providing faecal material for metagenomic sequencing. This work was  
444 funded through a Marsden grant (MAU-1703) to O.S. and a Massey University Research Fund  
445 grant to N.F.

## 446 Author contributions

447 OKS and NEF conceived and designed the experiments. AS, JW, GF, and NEF performed the  
448 experiments. OKS performed the computational analyses. OKS and AS drafted the manuscript,  
449 with input from NEF. All authors read and approved the manuscript.

## 450 Data accessibility

451 All read data are available from NCBI (BioProject PRJNA665129). The genome sequence of  
452 L3Cip3 is available as BioSample SAMN16242922.

## 453 References

- 454 Andrews, J. M. (2001). Determination of minimum inhibitory concentrations. *The Journal of*  
455 *Antimicrobial Chemotherapy*, 48 Suppl 1, 5–16. [https://doi.org/10.1093/jac/48.suppl\\_1.5](https://doi.org/10.1093/jac/48.suppl_1.5)
- 456 Baker, S., Thomson, N., Weill, F.-X., & Holt, K. E. (2018). Genomic insights into the emergence  
457 and spread of antimicrobial-resistant bacterial pathogens. *Science (New York, N. Y.)*,  
458 360(6390), 733–738. <https://doi.org/10.1126/science.aar3777>
- 459 Bertels, F., Silander, O. K., Pachkov, M., Rainey, P. B., & van Nimwegen, E. (2014). Automated  
460 reconstruction of whole-genome phylogenies from short-sequence reads. *Molecular*  
461 *Biology and Evolution*, 31(5), 1077–1088. <https://doi.org/10.1093/molbev/msu088>
- 462 Bortolaia, V., Kaas, R. S., Ruppe, E., Roberts, M. C., Schwarz, S., Cattoir, V., Philippon, A.,  
463 Allesoe, R. L., Rebelo, A. R., Florensa, A. F., Fagelhauer, L., Chakraborty, T., Neumann,  
464 B., Werner, G., Bender, J. K., Stingl, K., Nguyen, M., Coppens, J., Xavier, B. B., ...  
465 Aarestrup, F. M. (2020). ResFinder 4.0 for predictions of phenotypes from genotypes.  
466 *The Journal of Antimicrobial Chemotherapy*. <https://doi.org/10.1093/jac/dkaa345>
- 467 Breckell, G., & Silander, O. K. (2020). Complete Genome Sequences of 47 Environmental  
468 Isolates of Escherichia coli. *Microbiology Resource Announcements*, 9(38).  
469 <https://doi.org/10.1128/MRA.00222-20>
- 470 Chiu, C. Y., & Miller, S. A. (2019). Clinical metagenomics. *Nature Reviews. Genetics*, 20(6),  
471 341–355. <https://doi.org/10.1038/s41576-019-0113-7>
- 472 Cookson, A. L., Biggs, P. J., Marshall, J. C., Reynolds, A., Collis, R. M., French, N. P., &  
473 Brightwell, G. (2017). Culture independent analysis using gnd as a target gene to assess  
474 Escherichia coli diversity and community structure. *Scientific Reports*, 7(1), 841.  
475 <https://doi.org/10.1038/s41598-017-00890-6>
- 476 Cuscó, A., Viñes, J., D'Andrea, S., Riva, F., Casellas, J., Sánchez, A., & Francino, O. (2017).  
477 *Using MinION™ to characterize dog skin microbiota through full-length 16S rRNA gene*  
478 *sequencing approach*. 20. <https://doi.org/10.1101/167015>
- 479 Doench, J. G., Hartenian, E., Graham, D. B., Tothova, Z., Hegde, M., Smith, I., Sullender, M.,

- 480 Ebert, B. L., Xavier, R. J., & Root, D. E. (2014). Rational design of highly active sgRNAs  
481 for CRISPR-Cas9-mediated gene inactivation. *Nature Biotechnology*, 32(12),  
482 1262–1267. <https://doi.org/10.1038/nbt.3026>
- 483 Etayash, H., Khan, M. F., Kaur, K., & Thundat, T. (2016). Microfluidic cantilever detects bacteria  
484 and measures their susceptibility to antibiotics in small confined volumes. *Nature*  
485 *Communications*, 7(1), 12947. <https://doi.org/10.1038/ncomms12947>
- 486 *FigTree*. <http://tree.bio.ed.ac.uk/software/figtree/>
- 487 Gu, W., Miller, S., & Chiu, C. Y. (2019). Clinical Metagenomic Next-Generation Sequencing for  
488 Pathogen Detection. *Annual Review of Pathology*, 14, 319–338.  
489 <https://doi.org/10.1146/annurev-pathmechdis-012418-012751>
- 490 Guy, L., Roat Kultima, J., & Andersson, S. G. E. (2010). genoPlotR: Comparative gene and  
491 genome visualization in R. *Bioinformatics*, 26(18), 2334–2335.  
492 <https://doi.org/10.1093/bioinformatics/btq413>
- 493 Havlicek, V., Lemr, K., & Schug, K. A. (2013). Current trends in microbial diagnostics based on  
494 mass spectrometry. *Analytical Chemistry*, 85(2), 790–797.  
495 <https://doi.org/10.1021/ac3031866>
- 496 Jain, M., Olsen, H. E., Paten, B., & Akeson, M. (2016). The Oxford Nanopore MinION: Delivery  
497 of nanopore sequencing to the genomics community. *Genome Biology*, 17(1), 239.  
498 <https://doi.org/10.1186/s13059-016-1103-0>
- 499 Johnson, J. S., Spakowicz, D. J., Hong, B.-Y., Petersen, L. M., Demkowicz, P., Chen, L.,  
500 Leopold, S. R., Hanson, B. M., Agresta, H. O., Gerstein, M., Sodergren, E., & Weinstock,  
501 G. M. (2019). Evaluation of 16S rRNA gene sequencing for species and strain-level  
502 microbiome analysis. *Nature Communications*, 10(1), 5029.  
503 <https://doi.org/10.1038/s41467-019-13036-1>
- 504 Jorgensen, J. H., & Ferraro, M. J. (2009). Antimicrobial susceptibility testing: A review of general  
505 principles and contemporary practices. *Clinical Infectious Diseases: An Official*  
506 *Publication of the Infectious Diseases Society of America*, 49(11), 1749–1755.  
507 <https://doi.org/10.1086/647952>

- 508 Kiehlbauch, J. A., Hannett, G. E., Salfinger, M., Archinal, W., Monserrat, C., & Carlyn, C. (2000).  
509 Use of the National Committee for Clinical Laboratory Standards guidelines for disk  
510 diffusion susceptibility testing in New York state laboratories. *Journal of Clinical*  
511 *Microbiology*, 38(9), 3341–3348. <https://doi.org/10.1128/JCM.38.9.3341-3348.2000>
- 512 Labun, K., Montague, T. G., Gagnon, J. A., Thyme, S. B., & Valen, E. (2016). CHOPCHOP v2: A  
513 web tool for the next generation of CRISPR genome engineering. *Nucleic Acids*  
514 *Research*, 44(W1), W272–W276. <https://doi.org/10.1093/nar/gkw398>
- 515 Labun, K., Montague, T. G., Krause, M., Torres Cleuren, Y. N., Tjeldnes, H., & Valen, E. (2019).  
516 CHOPCHOP v3: Expanding the CRISPR web toolbox beyond genome editing. *Nucleic*  
517 *Acids Research*, 47(W1), W171–W174. <https://doi.org/10.1093/nar/gkz365>
- 518 Liu, X., Homma, A., Sayadi, J., Yang, S., Ohashi, J., & Takumi, T. (2016). Sequence features  
519 associated with the cleavage efficiency of CRISPR/Cas9 system. *Scientific Reports*,  
520 6(1), 19675. <https://doi.org/10.1038/srep19675>
- 521 Lyden, A. (2019). *In Vitro Transcription for dgRNA*.  
522 <https://doi.org/10.17504/protocols.io.3bpgimn>
- 523 Quan, J., Langelier, C., Kuchta, A., Batson, J., Teyssier, N., Lyden, A., Caldera, S., McGeever,  
524 A., Dimitrov, B., King, R., Wilhelm, J., Murphy, M., Ares, L. P., Travisano, K. A., Sit, R.,  
525 Amato, R., Mumbengegwi, D. R., Smith, J. L., Bennett, A., ... Crawford, E. D. (2019).  
526 FLASH: A next-generation CRISPR diagnostic for multiplexed detection of antimicrobial  
527 resistance sequences. *Nucleic Acids Research*, 47(14), e83.  
528 <https://doi.org/10.1093/nar/gkz418>
- 529 R Core Team (2017). R: A language and environment for statistical computing. R Foundation for  
530 Statistical Computing, Vienna, Austria. URL <https://www.R-project.org/>
- 531 Seemann, T. (2014). Prokka: Rapid prokaryotic genome annotation. *Bioinformatics*, 30(14),  
532 2068–2069. <https://doi.org/10.1093/bioinformatics/btu153>
- 533 Stoddard, S. F., Smith, B. J., Hein, R., Roller, B. R. K., & Schmidt, T. M. (2015). rrnDB: Improved  
534 tools for interpreting rRNA gene abundance in bacteria and archaea and a new  
535 foundation for future development. *Nucleic Acids Research*, 43(Database issue),

- 536 D593-598. <https://doi.org/10.1093/nar/gku1201>
- 537 Syal, K., Mo, M., Yu, H., Iriya, R., Jing, W., Guodong, S., Wang, S., Grys, T. E., Haydel, S. E., &  
538 Tao, N. (2017). Current and emerging techniques for antibiotic susceptibility tests.  
539 *Theranostics*, 7(7), 1795–1805. <https://doi.org/10.7150/thno.19217>
- 540 Van Hamelsveld, S., Adewale, M. E., Kurenbach, B., Godsoe, W., Harding, J. S.,  
541 Remus-Emsermann, M. N. P., & Heinemann, J. A. (2019). Prevalence of  
542 antibiotic-resistant *Escherichia coli* isolated from urban and agricultural streams in  
543 Canterbury, New Zealand. *FEMS Microbiology Letters*, 366(8).  
544 <https://doi.org/10.1093/femsle/fnz104>
- 545 Wick, R. R., Judd, L. M., Gorrie, C. L., & Holt, K. E. (2017). Unicycler: Resolving bacterial  
546 genome assemblies from short and long sequencing reads. *PLOS Computational*  
547 *Biology*, 13(6), e1005595. <https://doi.org/10.1371/journal.pcbi.1005595>
- 548 Wilson, W. J., Strout, C. L., DeSantis, T. Z., Stilwell, J. L., Carrano, A. V., & Andersen, G. L.  
549 (2002). Sequence-specific identification of 18 pathogenic microorganisms using  
550 microarray technology. *Molecular and Cellular Probes*, 16(2), 119–127.  
551 <https://doi.org/10.1006/mcpr.2001.0397>
- 552 Zumla, A., Al-Tawfiq, J. A., Enne, V. I., Kidd, M., Drosten, C., Breuer, J., Muller, M. A., Hui, D.,  
553 Maeurer, M., Bates, M., Mwaba, P., Al-Hakeem, R., Gray, G., Gautret, P., Al-Rabeeh, A.  
554 A., Memish, Z. A., & Gant, V. (2014). Rapid point of care diagnostic tests for viral and  
555 bacterial respiratory tract infections—Needs, advances, and future prospects. *The*  
556 *Lancet Infectious Diseases*, 14(11), 1123–1135.  
557 [https://doi.org/10.1016/S1473-3099\(14\)70827-8](https://doi.org/10.1016/S1473-3099(14)70827-8)



## 558 Supplementary figures

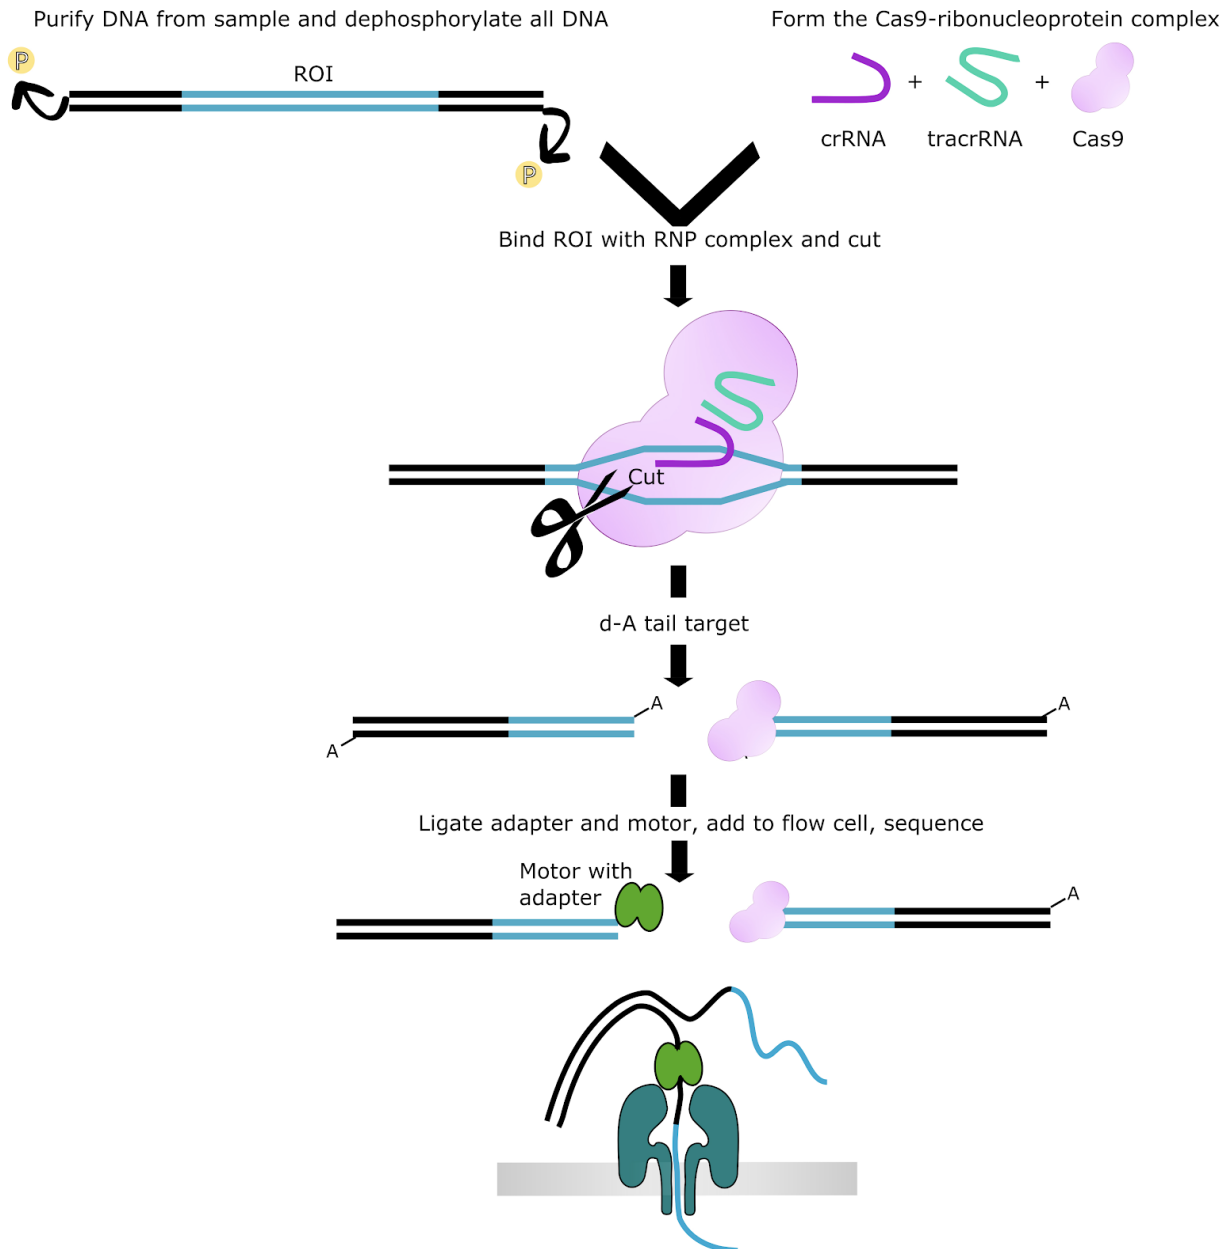

559 **Figure S1. Illustration of the method for CRISPR-Cas9 enrichment and sequencing of**  
560 **targeted regions.** First, genomic DNA is dephosphorylated. Ribonucleoprotein complexes  
561 (RNP) are formed from cas9, tracrRNA, and crRNA targeting the region of interest. Once cut,  
562 the ends of the target are d-A tailed, and sequencing adapters are ligated.

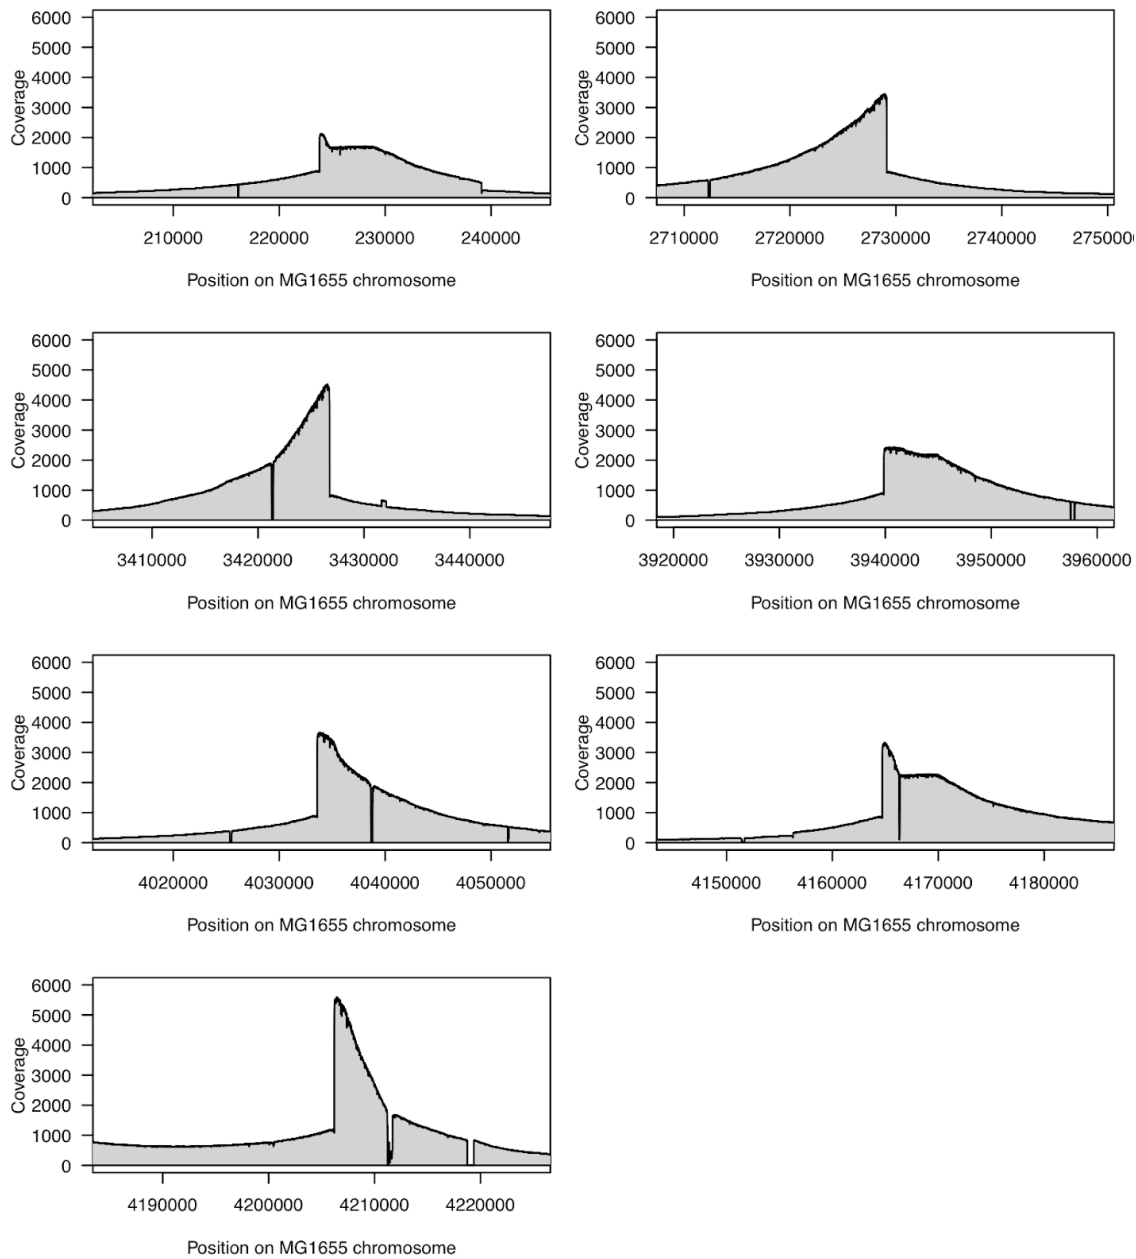

563 **Figure S2. Small insertions and deletions at all 16S loci distinguish *E. coli* L3Cip3 from MG1655.**  
564 Each panel shows the coverage depth at one of the seven 16S operons in K12 when mapping reads from  
565 a Bac-PULCE run targeting L3Cip3 16S with a crRNA. Small insertions and deletions are readily  
566 apparent and allow strains to be distinguished when using long reads.

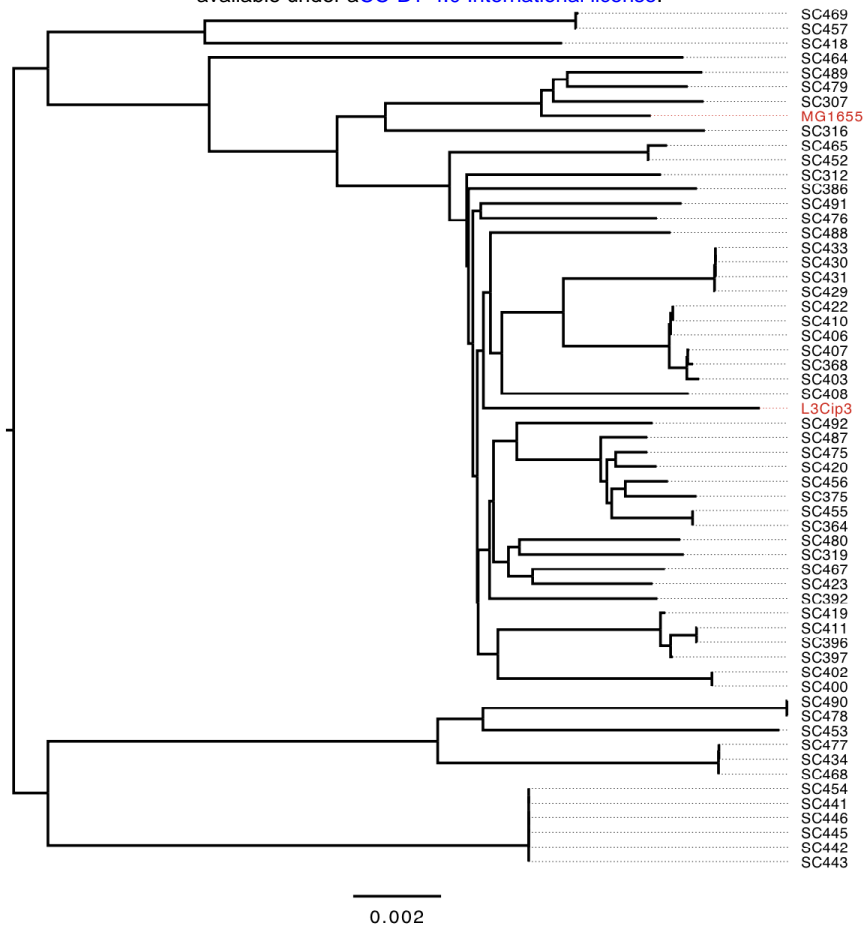

567 **Figure S3. Phylogeny of strains used to test accuracy of strain classification using *gnd* and 16S**  
568 **Bac-PULCE reads.** The phylogeny was constructed from whole genome sequences (Breckell & Silander,  
569 2020) using REALPHY (Bertels et al., 2014). *E. coli* K12 MG1655 and L3Cip3 are highlighted in red. This  
570 figure was constructed using FigTree.

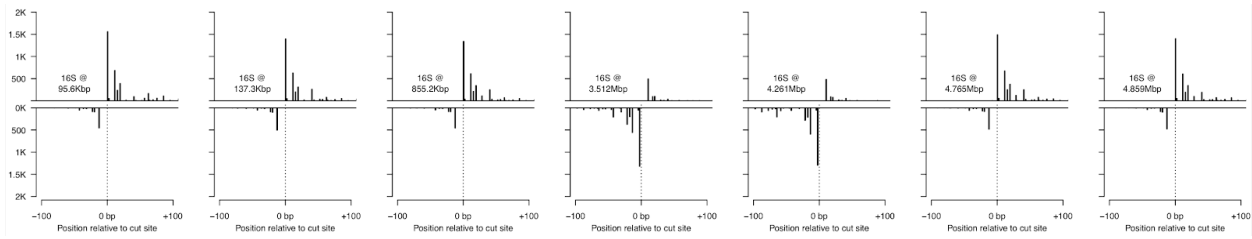

571 **Figure S4. crRNA Binding and cutting efficiency and directionality bias are nearly identical at 16S**  
572 **rRNA regions.** The seven plots indicate the number of reads starting near each crRNA cut site. Lines  
573 above the axis indicate reads starting on the top strand; lines below begin on the bottom strand. The plots  
574 are shown in the order of cut sites, with the locations of the cut sites indicated on each plot. There is very  
575 little difference in cutting efficiency or directionality at each site, indicated by the similarity of the sequence  
576 start profiles. Reads on the fourth and fifth plots appear primarily on the bottom strand as these operons  
577 are organised in the opposite direction compared to the other 16S operons.
